# Supplementary material for: Gender Differences in the Association Between Hearing Loss and Cognitive Function
Source: PubMed Central journal article supplement — Am J Alzheimers Dis Other Demen. 2019 Sep 11;35:1533317519871167. doi: 10.1177/1533317519871167 (PMC10623990; doi:10.1177/1533317519871167), 2019-09-11
Supplement: Supplemental_File.pdf [file Supplemental_File.pdf]

## **Supplemental Material**

### **Gender Differences in the Association between Hearing Loss and Cognitive Function**

Bowen Huang, MD, Guilan Cao, PhD, Yanran Duan, PhD, Siyu Yan, MD, Mingming Yan, PhD, Ping Yin, PhD ; Hongwei Jiang, PhD

**Table a** Regression coefficients  $\beta$  (95% confidence intervals) of Hearing Loss and Hearing Aid Use for Cognitive Function (composite z-score), NHANES 2011-2012

|                 | <b>Model 1</b>             | <b>Model 2</b>           | <b>Model 3</b>            | <b>Model 4</b>            |
|-----------------|----------------------------|--------------------------|---------------------------|---------------------------|
| <b>Male</b>     |                            |                          |                           |                           |
| Hearing loss    | -12.29 (-20.01 to -4.56)** | -7.38 (-13.69 to -1.07)* | -7.26 (-12.28 to -2.24)** | -7.37 (-11.98 to -2.75)** |
| Hearing aid use | 56.37 (28.11 to 84.64)**   | 37.89 (13.92 to 61.86)** | 39.78 (14.92 to 64.64)**  | 38.84 (13.23 to 64.44)**  |
| <b>Female</b>   |                            |                          |                           |                           |
| Hearing loss    | -8.56 (-11.68 to -5.44)**  | -4.49 (-9.51 to 0.52)    | -4.83 (-10.83 to 1.17)    | -4.96 (-10.70 to 0.79)    |
| Hearing aid use | 47.56 (18.93 to 76.19)**   | 17.29 (-14.38 to 48.96)  | 19.45 (-15.56 to 54.46)   | 17.38 (-12.51 to 47.27)   |

Notes:  $\beta$ -Coefficients indicated the change in composite z-scores when hearing loss increased by 10 dB or with hearing aid use. Adjusted covariates: Model 1 = hearing aid use, age. Model 2 = Model 1 + (race/ethnicity, education, marital status, poverty income ratio, total cholesterol and high-density lipoprotein cholesterol). Model 3 = Model 2 + (smoking status and alcohol consumption). Model 4 = Model 3 + (diabetes, hypertension and stroke). \* $P < 0.05$ ; \*\* $P < 0.01$ .

Table a contains the result of multiple linear regression models that describe the gender differences in the relationship between hearing loss and cognitive function. In a fully adjusted model, when hearing loss was expressed as a continuous variable, hearing loss was statistically significantly associated with composite z-scores in males ( $\beta$  -7.37, 95% CI -11.98 to -2.75). In contrast, there was no association in females ( $\beta$  38.84, 95% CI 13.23 to 64.44). Hearing aid use remained associated with higher cognitive scores only among males ( $\beta$  38.84, 95% CI 13.23 to 64.44).
